# Supplementary material for: Canonical PRC2 function is essential for mammary gland development and affects chromatin compaction in mammary organoids
Source: PLoS Biol. 2018 Aug 6;16(8):e2004986. doi: 10.1371/journal.pbio.2004986 (PMC6095611; doi:10.1371/journal.pbio.2004986)
Supplement: S5 Data — ATAC-seq, assay for transposase-accessible chromatin using sequencing; GO, Gene ontology; RNA-seq, RNA sequencing; Wt, wild-type. (XLSX) [file pbio.2004986.s012.xlsx]

## Sheet: Sheet1
Analysis Type:	PANTHER Overrepresentation Test (release 20170413)
Annotation Version and Release Date:	GO Ontology database Released 2017-08-14
Analyzed List:	upload_1 (Mus musculus)
Reference List:	Mus musculus (all genes in database)
Bonferroni correction:	TRUE
Bonferroni count:	8483
GO biological process complete	Mus musculus - REFLIST (22221)	upload_1 (204)	upload_1 (expected)	upload_1 (over/under)	upload_1 (fold Enrichment)	upload_1 (P-value)	-log10 P-value
anatomical structure development (GO:0048856)	4795	121	44.02	+	2.75	1.96e-27	26.7077
multicellular organism development (GO:0007275)	4506	116	41.37	+	2.8	1.99e-26	25.7011
developmental process (GO:0032502)	5122	123	47.02	+	2.62	4.89e-26	25.3107
system development (GO:0048731)	3943	106	36.2	+	2.93	1.58e-24	23.8013
animal organ development (GO:0048513)	2807	87	25.77	+	3.38	1.54e-22	21.8125
anatomical structure morphogenesis (GO:0009653)	2031	73	18.65	+	3.92	1.79e-21	20.7471
regulation of transcription from RNA polymerase II promoter (GO:0006357)	1837	68	16.86	+	4.03	2.89e-20	19.5391
central nervous system development (GO:0007417)	747	45	6.86	+	6.56	7.82e-20	19.1068
regionalization (GO:0003002)	339	33	3.11	+	10.6	9.24e-20	19.0343
pattern specification process (GO:0007389)	430	35	3.95	+	8.87	1.12e-18	17.9508
nervous system development (GO:0007399)	2093	70	19.21	+	3.64	1.55e-18	17.8097
neuron differentiation (GO:0030182)	940	48	8.63	+	5.56	1.93e-18	17.7144
regulation of transcription, DNA-templated (GO:0006355)	3094	85	28.4	+	2.99	2.72e-18	17.5654
regulation of nucleic acid-templated transcription (GO:1903506)	3109	85	28.54	+	2.98	3.75e-18	17.426
regulation of RNA biosynthetic process (GO:2001141)	3115	85	28.6	+	2.97	4.25e-18	17.3716
regulation of RNA metabolic process (GO:0051252)	3273	87	30.05	+	2.9	5.98e-18	17.2233
regulation of gene expression (GO:0010468)	3837	94	35.23	+	2.67	1.5e-17	16.8239
cellular developmental process (GO:0048869)	3496	89	32.1	+	2.77	2.83e-17	16.5482
transcription, DNA-templated (GO:0006351)	1903	65	17.47	+	3.72	2.92e-17	16.5346
nucleic acid-templated transcription (GO:0097659)	1904	65	17.48	+	3.72	3e-17	16.5229
RNA biosynthetic process (GO:0032774)	1907	65	17.51	+	3.71	3.26e-17	16.4868
tissue development (GO:0009888)	1522	58	13.97	+	4.15	4.63e-17	16.3344
positive regulation of transcription from RNA polymerase II promoter (GO:0045944)	1117	50	10.25	+	4.88	5.87e-17	16.2314
regulation of cellular biosynthetic process (GO:0031326)	3770	92	34.61	+	2.66	7.25e-17	16.1397
regulation of nucleobase-containing compound metabolic process (GO:0019219)	3634	90	33.36	+	2.7	9.54e-17	16.0205
regulation of nitrogen compound metabolic process (GO:0051171)	5169	109	47.45	+	2.3	1.12e-16	15.9508
cell differentiation (GO:0030154)	3427	87	31.46	+	2.77	1.28e-16	15.8928
regulation of biosynthetic process (GO:0009889)	3826	92	35.12	+	2.62	2.02e-16	15.6946
neurogenesis (GO:0022008)	1586	58	14.56	+	3.98	3.24e-16	15.4895
regulation of cellular macromolecule biosynthetic process (GO:2000112)	3478	87	31.93	+	2.72	3.38e-16	15.4711
generation of neurons (GO:0048699)	1486	56	13.64	+	4.1	4.43e-16	15.3536
forebrain development (GO:0030900)	353	30	3.24	+	9.26	4.8e-16	15.3188
embryonic morphogenesis (GO:0048598)	598	37	5.49	+	6.74	5.25e-16	15.2798
head development (GO:0060322)	611	37	5.61	+	6.6	1.06e-15	14.9747
cell fate commitment (GO:0045165)	249	26	2.29	+	11.37	1.25e-15	14.9031
embryo development (GO:0009790)	1056	47	9.69	+	4.85	1.38e-15	14.8601
regulation of cellular metabolic process (GO:0031323)	5423	110	49.79	+	2.21	1.42e-15	14.8477
regulation of macromolecule biosynthetic process (GO:0010556)	3580	87	32.87	+	2.65	2.23e-15	14.6517
multicellular organismal process (GO:0032501)	7032	127	64.56	+	1.97	2.33e-15	14.6326
regulation of primary metabolic process (GO:0080090)	5294	108	48.6	+	2.22	2.78e-15	14.556
regulation of macromolecule metabolic process (GO:0060255)	5312	108	48.77	+	2.21	3.63e-15	14.4401
regulation of metabolic process (GO:0019222)	5756	113	52.84	+	2.14	3.74e-15	14.4271
negative regulation of biological process (GO:0048519)	4650	100	42.69	+	2.34	4.67e-15	14.3307
brain development (GO:0007420)	567	35	5.21	+	6.72	6.38e-15	14.1952
nucleobase-containing compound biosynthetic process (GO:0034654)	2139	65	19.64	+	3.31	1.19e-14	13.9245
animal organ morphogenesis (GO:0009887)	928	43	8.52	+	5.05	1.5e-14	13.8239
aromatic compound biosynthetic process (GO:0019438)	2213	66	20.32	+	3.25	1.52e-14	13.8182
positive regulation of nucleic acid-templated transcription (GO:1903508)	1404	52	12.89	+	4.03	2.77e-14	13.5575
positive regulation of transcription, DNA-templated (GO:0045893)	1404	52	12.89	+	4.03	2.77e-14	13.5575
positive regulation of RNA biosynthetic process (GO:1902680)	1405	52	12.9	+	4.03	2.85e-14	13.5452
organic cyclic compound biosynthetic process (GO:1901362)	2317	67	21.27	+	3.15	3.71e-14	13.4306
heterocycle biosynthetic process (GO:0018130)	2205	65	20.24	+	3.21	5.48e-14	13.2612
regulation of multicellular organismal process (GO:0051239)	2747	73	25.22	+	2.89	6.49e-14	13.1878
regulation of multicellular organismal development (GO:2000026)	1841	59	16.9	+	3.49	6.96e-14	13.1574
tube development (GO:0035295)	627	35	5.76	+	6.08	1.37e-13	12.8633
positive regulation of RNA metabolic process (GO:0051254)	1477	52	13.56	+	3.83	2.3e-13	12.6383
negative regulation of cellular process (GO:0048523)	4219	91	38.73	+	2.35	5.29e-13	12.2765
neuron fate commitment (GO:0048663)	80	16	0.73	+	21.79	8.4e-13	12.0757
regulation of developmental process (GO:0050793)	2357	65	21.64	+	3	1.48e-12	11.8297
positive regulation of gene expression (GO:0010628)	1760	55	16.16	+	3.4	3.72e-12	11.4295
cell development (GO:0048468)	1539	51	14.13	+	3.61	5.75e-12	11.2403
positive regulation of nucleobase-containing compound metabolic process (GO:0045935)	1727	54	15.85	+	3.41	7.27e-12	11.1385
positive regulation of macromolecule biosynthetic process (GO:0010557)	1646	52	15.11	+	3.44	1.91e-11	10.719
positive regulation of cellular biosynthetic process (GO:0031328)	1780	54	16.34	+	3.3	2.55e-11	10.5935
negative regulation of transcription, DNA-templated (GO:0045892)	1093	42	10.03	+	4.19	2.61e-11	10.5834
macromolecule biosynthetic process (GO:0009059)	2712	68	24.9	+	2.73	2.67e-11	10.5735
cellular nitrogen compound biosynthetic process (GO:0044271)	2579	66	23.68	+	2.79	3.07e-11	10.5129
positive regulation of cellular process (GO:0048522)	4836	95	44.4	+	2.14	3.21e-11	10.4935
negative regulation of nucleic acid-templated transcription (GO:1903507)	1109	42	10.18	+	4.13	4.26e-11	10.3706
negative regulation of RNA biosynthetic process (GO:1902679)	1110	42	10.19	+	4.12	4.4e-11	10.3565
cellular macromolecule biosynthetic process (GO:0034645)	2677	67	24.58	+	2.73	5.12e-11	10.2907
positive regulation of biosynthetic process (GO:0009891)	1814	54	16.65	+	3.24	5.55e-11	10.2557
negative regulation of RNA metabolic process (GO:0051253)	1189	43	10.92	+	3.94	9.25e-11	10.0339
regulation of anatomical structure morphogenesis (GO:0022603)	944	38	8.67	+	4.38	1.62e-10	9.79048
mesenchyme development (GO:0060485)	187	19	1.72	+	11.07	1.92e-10	9.7167
central nervous system neuron differentiation (GO:0021953)	191	19	1.75	+	10.84	2.78e-10	9.55596
neuron development (GO:0048666)	765	34	7.02	+	4.84	2.95e-10	9.53018
negative regulation of nucleobase-containing compound metabolic process (GO:0045934)	1344	45	12.34	+	3.65	3e-10	9.52288
muscle structure development (GO:0061061)	462	27	4.24	+	6.37	3.16e-10	9.50031
negative regulation of cellular biosynthetic process (GO:0031327)	1405	46	12.9	+	3.57	3.26e-10	9.48678
embryonic organ development (GO:0048568)	464	27	4.26	+	6.34	3.49e-10	9.45717
positive regulation of nitrogen compound metabolic process (GO:0051173)	2788	67	25.6	+	2.62	3.64e-10	9.4389
RNA metabolic process (GO:0016070)	2662	65	24.44	+	2.66	4.93e-10	9.30715
telencephalon regionalization (GO:0021978)	16	9	0.15	+	61.27	5.48e-10	9.26122
negative regulation of gene expression (GO:0010629)	1488	47	13.66	+	3.44	5.93e-10	9.22695
regulation of cell differentiation (GO:0045595)	1673	50	15.36	+	3.26	6.32e-10	9.19928
negative regulation of biosynthetic process (GO:0009890)	1435	46	13.17	+	3.49	6.91e-10	9.16052
positive regulation of biological process (GO:0048518)	5342	98	49.04	+	2	7.4e-10	9.13077
chordate embryonic development (GO:0043009)	698	32	6.41	+	4.99	8.02e-10	9.09583
biological regulation (GO:0065007)	11376	156	104.44	+	1.49	8.61e-10	9.065
anatomical structure formation involved in morphogenesis (GO:0048646)	851	35	7.81	+	4.48	1.1e-09	8.95861
embryo development ending in birth or egg hatching (GO:0009792)	707	32	6.49	+	4.93	1.13e-09	8.94692
positive regulation of developmental process (GO:0051094)	1338	44	12.28	+	3.58	1.14e-09	8.9431
negative regulation of cellular macromolecule biosynthetic process (GO:2000113)	1283	43	11.78	+	3.65	1.21e-09	8.91721
regulation of cellular process (GO:0050794)	10275	146	94.33	+	1.55	1.76e-09	8.75449
embryonic organ morphogenesis (GO:0048562)	309	22	2.84	+	7.76	1.88e-09	8.72584
forebrain regionalization (GO:0021871)	28	10	0.26	+	38.9	1.88e-09	8.72584
regulation of biological process (GO:0050789)	10867	151	99.76	+	1.51	1.97e-09	8.70553
limb development (GO:0060173)	188	18	1.73	+	10.43	2.54e-09	8.59517
appendage development (GO:0048736)	188	18	1.73	+	10.43	2.54e-09	8.59517
epithelium development (GO:0060429)	987	37	9.06	+	4.08	3.15e-09	8.50169
locomotion (GO:0040011)	1042	38	9.57	+	3.97	3.3e-09	8.48149
cell fate specification (GO:0001708)	74	13	0.68	+	19.14	3.35e-09	8.47496
limb morphogenesis (GO:0035108)	165	17	1.51	+	11.22	3.76e-09	8.42481
appendage morphogenesis (GO:0035107)	165	17	1.51	+	11.22	3.76e-09	8.42481
positive regulation of macromolecule metabolic process (GO:0010604)	2862	66	26.27	+	2.51	4.18e-09	8.37882
cellular biosynthetic process (GO:0044249)	3395	73	31.17	+	2.34	4.39e-09	8.35754
negative regulation of macromolecule biosynthetic process (GO:0010558)	1334	43	12.25	+	3.51	4.43e-09	8.3536
telencephalon development (GO:0021537)	225	19	2.07	+	9.2	4.78e-09	8.32057
negative regulation of transcription from RNA polymerase II promoter (GO:0000122)	796	33	7.31	+	4.52	4.85e-09	8.31426
positive regulation of metabolic process (GO:0009893)	3106	69	28.51	+	2.42	5.72e-09	8.2426
gene expression (GO:0010467)	2965	67	27.22	+	2.46	6.61e-09	8.1798
positive regulation of cellular metabolic process (GO:0031325)	2909	66	26.71	+	2.47	8.84e-09	8.05355
tissue morphogenesis (GO:0048729)	583	28	5.35	+	5.23	1.11e-08	7.95468
biosynthetic process (GO:0009058)	3545	74	32.54	+	2.27	1.23e-08	7.91009
organic substance biosynthetic process (GO:1901576)	3479	73	31.94	+	2.29	1.48e-08	7.82974
neuron fate specification (GO:0048665)	36	10	0.33	+	30.26	2.18e-08	7.66154
neuron migration (GO:0001764)	135	15	1.24	+	12.1	3.26e-08	7.48678
spinal cord development (GO:0021510)	89	13	0.82	+	15.91	3.28e-08	7.48413
positive regulation of multicellular organismal process (GO:0051240)	1608	46	14.76	+	3.12	3.61e-08	7.44249
nucleic acid metabolic process (GO:0090304)	3085	67	28.32	+	2.37	4.09e-08	7.38828
cell part morphogenesis (GO:0032990)	453	24	4.16	+	5.77	6.91e-08	7.16052
negative regulation of cellular metabolic process (GO:0031324)	2316	56	21.26	+	2.63	7.55e-08	7.12205
muscle organ development (GO:0007517)	268	19	2.46	+	7.72	9.41e-08	7.02641
neuron projection morphogenesis (GO:0048812)	419	23	3.85	+	5.98	9.65e-08	7.01547
cell morphogenesis involved in neuron differentiation (GO:0048667)	382	22	3.51	+	6.27	1.12e-07	6.95078
plasma membrane bounded cell projection morphogenesis (GO:0120039)	424	23	3.89	+	5.91	1.22e-07	6.91364
negative regulation of macromolecule metabolic process (GO:0010605)	2276	55	20.89	+	2.63	1.26e-07	6.89963
cell projection morphogenesis (GO:0048858)	429	23	3.94	+	5.84	1.53e-07	6.81531
negative regulation of nitrogen compound metabolic process (GO:0051172)	2154	53	19.77	+	2.68	1.72e-07	6.76447
regulation of nervous system development (GO:0051960)	912	33	8.37	+	3.94	1.77e-07	6.75203
regulation of cell communication (GO:0010646)	2810	62	25.8	+	2.4	1.88e-07	6.72584
negative regulation of metabolic process (GO:0009892)	2522	58	23.15	+	2.51	2.11e-07	6.67572
regulation of neurogenesis (GO:0050767)	816	31	7.49	+	4.14	2.34e-07	6.63078
muscle tissue development (GO:0060537)	320	20	2.94	+	6.81	2.42e-07	6.61618
movement of cell or subcellular component (GO:0006928)	1206	38	11.07	+	3.43	2.45e-07	6.61083
regulation of signaling (GO:0023051)	2832	62	26	+	2.38	2.61e-07	6.58336
anterior/posterior pattern specification (GO:0009952)	217	17	1.99	+	8.53	2.62e-07	6.5817
neuron projection development (GO:0031175)	622	27	5.71	+	4.73	2.78e-07	6.55596
nucleobase-containing compound metabolic process (GO:0006139)	3544	71	32.54	+	2.18	3.11e-07	6.50724
mesenchymal cell differentiation (GO:0048762)	132	14	1.21	+	11.55	3.17e-07	6.49894
axon development (GO:0061564)	328	20	3.01	+	6.64	3.73e-07	6.42829
negative regulation of cell differentiation (GO:0045596)	679	28	6.23	+	4.49	3.74e-07	6.42713
regulation of cell development (GO:0060284)	941	33	8.64	+	3.82	3.97e-07	6.40121
cellular aromatic compound metabolic process (GO:0006725)	3725	73	34.2	+	2.13	3.99e-07	6.39903
cell morphogenesis involved in differentiation (GO:0000904)	499	24	4.58	+	5.24	4.9e-07	6.3098
negative regulation of developmental process (GO:0051093)	910	32	8.35	+	3.83	7.57e-07	6.1209
striated muscle tissue development (GO:0014706)	304	19	2.79	+	6.81	7.75e-07	6.1107
embryonic limb morphogenesis (GO:0030326)	142	14	1.3	+	10.74	8.13e-07	6.08991
embryonic appendage morphogenesis (GO:0035113)	142	14	1.3	+	10.74	8.13e-07	6.08991
axonogenesis (GO:0007409)	307	19	2.82	+	6.74	9.12e-07	6.04001
endocrine system development (GO:0035270)	120	13	1.1	+	11.8	1.25e-06	5.90309
organic cyclic compound metabolic process (GO:1901360)	3913	74	35.92	+	2.06	1.47e-06	5.83268
heterocycle metabolic process (GO:0046483)	3671	71	33.7	+	2.11	1.56e-06	5.80688
sensory organ morphogenesis (GO:0090596)	280	18	2.57	+	7	1.59e-06	5.7986
cell morphogenesis (GO:0000902)	640	26	5.88	+	4.43	2.69e-06	5.57025
sensory organ development (GO:0007423)	544	24	4.99	+	4.81	2.73e-06	5.56384
cell migration (GO:0016477)	744	28	6.83	+	4.1	2.91e-06	5.53611
cerebral cortex regionalization (GO:0021796)	9	6	0.08	+	72.62	3.25e-06	5.48812
cerebral cortex development (GO:0021987)	105	12	0.96	+	12.45	3.55e-06	5.44977
forelimb morphogenesis (GO:0035136)	44	9	0.4	+	22.28	3.95e-06	5.4034
cell proliferation (GO:0008283)	556	24	5.1	+	4.7	4.19e-06	5.37779
skeletal muscle tissue development (GO:0007519)	133	13	1.22	+	10.65	4.28e-06	5.36856
positive regulation of cell differentiation (GO:0045597)	981	32	9.01	+	3.55	4.83e-06	5.31605
regulation of neuron differentiation (GO:0045664)	674	26	6.19	+	4.2	7.91e-06	5.10182
skeletal muscle organ development (GO:0060538)	141	13	1.29	+	10.04	8.57e-06	5.06702
regulation of signal transduction (GO:0009966)	2482	54	22.79	+	2.37	9.75e-06	5.011
cellular component morphogenesis (GO:0032989)	735	27	6.75	+	4	1.04e-05	4.98297
stem cell differentiation (GO:0048863)	145	13	1.33	+	9.77	1.19e-05	4.92445
skeletal system development (GO:0001501)	446	21	4.09	+	5.13	1.21e-05	4.91721
pallium development (GO:0021543)	146	13	1.34	+	9.7	1.3e-05	4.88606
axon guidance (GO:0007411)	178	14	1.63	+	8.57	1.44e-05	4.84164
diencephalon development (GO:0021536)	71	10	0.65	+	15.34	1.47e-05	4.83268
neuron projection guidance (GO:0097485)	180	14	1.65	+	8.47	1.66e-05	4.77989
cell differentiation in spinal cord (GO:0021515)	53	9	0.49	+	18.5	1.97e-05	4.70553
regulation of cell proliferation (GO:0042127)	1555	40	14.28	+	2.8	2.55e-05	4.59346
negative regulation of multicellular organismal process (GO:0051241)	1124	33	10.32	+	3.2	3.38e-05	4.47108
embryonic skeletal system morphogenesis (GO:0048704)	102	11	0.94	+	11.75	3.48e-05	4.45842
pituitary gland development (GO:0021983)	39	8	0.36	+	22.34	3.64e-05	4.4389
digestive system development (GO:0055123)	130	12	1.19	+	10.05	3.77e-05	4.42366
plasma membrane bounded cell projection organization (GO:0120036)	954	30	8.76	+	3.43	4.09e-05	4.38828
circulatory system development (GO:0072359)	841	28	7.72	+	3.63	4.2e-05	4.37675
morphogenesis of an epithelium (GO:0002009)	481	21	4.42	+	4.76	4.47e-05	4.34969
localization of cell (GO:0051674)	846	28	7.77	+	3.61	4.77e-05	4.32148
cell motility (GO:0048870)	846	28	7.77	+	3.61	4.77e-05	4.32148
regulation of organ morphogenesis (GO:2000027)	196	14	1.8	+	7.78	4.81e-05	4.31785
embryonic skeletal system development (GO:0048706)	134	12	1.23	+	9.75	5.26e-05	4.27901
endocardial cushion development (GO:0003197)	41	8	0.38	+	21.25	5.35e-05	4.27165
connective tissue development (GO:0061448)	200	14	1.84	+	7.62	6.18e-05	4.20901
cellular nitrogen compound metabolic process (GO:0034641)	4092	72	37.57	+	1.92	7.32e-05	4.13549
hindlimb morphogenesis (GO:0035137)	43	8	0.39	+	20.27	7.71e-05	4.11295
cell projection organization (GO:0030030)	992	30	9.11	+	3.29	9.8e-05	4.00877
digestive tract development (GO:0048565)	116	11	1.06	+	10.33	0.000128	3.89279
negative regulation of neurogenesis (GO:0050768)	295	16	2.71	+	5.91	0.000177	3.75203
ventral spinal cord development (GO:0021517)	48	8	0.44	+	18.15	0.000179	3.74715
mesenchymal cell development (GO:0014031)	69	9	0.63	+	14.21	0.000186	3.73049
stem cell development (GO:0048864)	70	9	0.64	+	14	0.00021	3.67778
tube morphogenesis (GO:0035239)	388	18	3.56	+	5.05	0.000238	3.62342
dorsal/ventral pattern formation (GO:0009953)	97	10	0.89	+	11.23	0.000272	3.56543
cellular macromolecule metabolic process (GO:0044260)	5408	85	49.65	+	1.71	0.000336	3.47366
embryonic digestive tract morphogenesis (GO:0048557)	20	6	0.18	+	32.68	0.00036	3.4437
positive regulation of cell proliferation (GO:0008284)	878	27	8.06	+	3.35	0.000409	3.38828
embryonic forelimb morphogenesis (GO:0035115)	35	7	0.32	+	21.79	0.000409	3.38828
regulation of response to stimulus (GO:0048583)	3338	61	30.64	+	1.99	0.000451	3.34582
negative regulation of nervous system development (GO:0051961)	318	16	2.92	+	5.48	0.000488	3.31158
positive regulation of nervous system development (GO:0051962)	566	21	5.2	+	4.04	0.000693	3.15927
morphogenesis of embryonic epithelium (GO:0016331)	172	12	1.58	+	7.6	0.000777	3.10958
positive regulation of cell communication (GO:0010647)	1491	36	13.69	+	2.63	0.000873	3.05899
positive regulation of signaling (GO:0023056)	1498	36	13.75	+	2.62	0.000978	3.00966
neural crest cell migration (GO:0001755)	40	7	0.37	+	19.06	0.001	3
negative regulation of cell development (GO:0010721)	336	16	3.08	+	5.19	0.00102	2.9914
negative regulation of response to stimulus (GO:0048585)	1383	34	12.7	+	2.68	0.00138	2.86012
cell fate determination (GO:0001709)	42	7	0.39	+	18.15	0.00139	2.85699
gland development (GO:0048732)	392	17	3.6	+	4.72	0.0015	2.82391
neural crest cell development (GO:0014032)	64	8	0.59	+	13.62	0.00158	2.80134
heart valve development (GO:0003170)	45	7	0.41	+	16.94	0.0022	2.65758
regulation of embryonic development (GO:0045995)	122	10	1.12	+	8.93	0.00221	2.65561
cardiocyte differentiation (GO:0035051)	123	10	1.13	+	8.86	0.00238	2.62342
macromolecule metabolic process (GO:0043170)	6122	90	56.2	+	1.6	0.00253	2.59688
skeletal system morphogenesis (GO:0048705)	232	13	2.13	+	6.1	0.00269	2.57025
regulation of odontogenesis (GO:0042481)	29	6	0.27	+	22.54	0.00312	2.50585
endocardial cushion morphogenesis (GO:0003203)	29	6	0.27	+	22.54	0.00312	2.50585
positive regulation of cell development (GO:0010720)	569	20	5.22	+	3.83	0.00333	2.47756
neural crest cell differentiation (GO:0014033)	71	8	0.65	+	12.27	0.00342	2.46597
outflow tract morphogenesis (GO:0003151)	71	8	0.65	+	12.27	0.00342	2.46597
heart development (GO:0007507)	520	19	4.77	+	3.98	0.00372	2.42946
gliogenesis (GO:0042063)	201	12	1.85	+	6.5	0.004	2.39794
heart morphogenesis (GO:0003007)	243	13	2.23	+	5.83	0.0045	2.34679
pancreas development (GO:0031016)	75	8	0.69	+	11.62	0.00514	2.28904
cellular process (GO:0009987)	13735	159	126.09	+	1.26	0.00533	2.27327
digestive tract morphogenesis (GO:0048546)	53	7	0.49	+	14.39	0.0065	2.18709
embryonic digestive tract development (GO:0048566)	33	6	0.3	+	19.8	0.00658	2.18177
embryonic hindlimb morphogenesis (GO:0035116)	33	6	0.3	+	19.8	0.00658	2.18177
ventral spinal cord interneuron differentiation (GO:0021514)	18	5	0.17	+	30.26	0.00725	2.13966
epithelial tube morphogenesis (GO:0060562)	347	15	3.19	+	4.71	0.00847	2.07212
positive regulation of neurogenesis (GO:0050769)	499	18	4.58	+	3.93	0.00908	2.04191
urogenital system development (GO:0001655)	306	14	2.81	+	4.98	0.0102	1.9914
nitrogen compound metabolic process (GO:0006807)	6797	95	62.4	+	1.52	0.0104	1.98297
positive regulation of neuron differentiation (GO:0045666)	405	16	3.72	+	4.3	0.0117	1.93181
neural tube development (GO:0021915)	184	11	1.69	+	6.51	0.012	1.92082
positive regulation of BMP signaling pathway (GO:0030513)	37	6	0.34	+	17.66	0.0127	1.8962
central nervous system neuron development (GO:0021954)	85	8	0.78	+	10.25	0.013	1.88606
respiratory system development (GO:0060541)	226	12	2.07	+	5.78	0.0134	1.8729
cartilage development (GO:0051216)	150	10	1.38	+	7.26	0.014	1.85387
skeletal muscle cell differentiation (GO:0035914)	60	7	0.55	+	12.71	0.0147	1.83268
endocrine pancreas development (GO:0031018)	38	6	0.35	+	17.2	0.0148	1.82974
primary metabolic process (GO:0044238)	7346	100	67.44	+	1.48	0.0148	1.82974
negative regulation of cell communication (GO:0010648)	1193	29	10.95	+	2.65	0.0157	1.8041
muscle cell differentiation (GO:0042692)	273	13	2.51	+	5.19	0.0161	1.79317
negative regulation of signaling (GO:0023057)	1197	29	10.99	+	2.64	0.0168	1.77469
forebrain neuron differentiation (GO:0021879)	63	7	0.58	+	12.1	0.0202	1.69465
lung development (GO:0030324)	195	11	1.79	+	6.14	0.0208	1.68194
organic substance metabolic process (GO:0071704)	7702	103	70.71	+	1.46	0.021	1.67778
glial cell differentiation (GO:0010001)	158	10	1.45	+	6.89	0.022	1.65758
regulation of BMP signaling pathway (GO:0030510)	92	8	0.84	+	9.47	0.0231	1.63639
eye morphogenesis (GO:0048592)	159	10	1.46	+	6.85	0.0233	1.63264
respiratory tube development (GO:0030323)	198	11	1.82	+	6.05	0.024	1.61979
kidney epithelium development (GO:0072073)	126	9	1.16	+	7.78	0.0269	1.57025
palate development (GO:0060021)	94	8	0.86	+	9.27	0.027	1.56864
cardiac septum morphogenesis (GO:0060411)	67	7	0.62	+	11.38	0.0301	1.52143
epithelial cell differentiation (GO:0030855)	491	17	4.51	+	3.77	0.0314	1.50307
mesenchyme morphogenesis (GO:0072132)	44	6	0.4	+	14.85	0.034	1.46852
eye development (GO:0001654)	346	14	3.18	+	4.41	0.0415	1.38195
positive regulation of signal transduction (GO:0009967)	1325	30	12.16	+	2.47	0.0421	1.37572
atrioventricular valve development (GO:0003171)	26	5	0.24	+	20.95	0.043	1.36653
bone development (GO:0060348)	171	10	1.57	+	6.37	0.0439	1.35754
